# Supplementary material for: Physiotherapist-led treatment for femoroacetabular impingement syndrome (the PhysioFIRST study): a protocol for a participant and assessor-blinded randomised controlled trial
Source: PubMed Central journal article supplement — BMJ Open. 2021 Apr 7;11(4):e041742. doi: 10.1136/bmjopen-2020-041742 (PMC8031040; doi:10.1136/bmjopen-2020-041742), 2021-04-07
Supplement: bmjopen-2020-041742supp002.pdf [file bmjopen-2020-041742supp002.pdf]

## Supplementary File 2: Standardised treatment therapist handbook

### The physiotherapy for Femoroacetabular Impingement Rehabilitation Study (physioFIRST): A participant and assessor-blinded randomised controlled trial of physiotherapy for hip impingement.

---

The Tiger group refers to the usual care, control group rehabilitation program for patients with femoroacetabular impingement (FAI).

The treatment program lasts for 6 months and has two phases. Phase 1 refers to months 0-3; Phase 2 refers to month 4-6 of treatment. Both phases target six key components of treatment. The four components of the rehabilitation program were selected to represent what could be “usual care” for hip pain, and has been tested in our pilot study

The four key components of the control program include:

1. ROM (flexion)
2. Standardised stretching
3. Standardised cardiovascular training/load management advice
4. Standardised Education

The two phases of treatment are outlines below.

#### Phase 1 month 0-3

This phase consists of

- i. Fortnightly one-on-one consultations with the treating physiotherapist;
- ii. Weekly physiotherapist-supervised gym sessions (these can be one-on-one or small groups, as long as there is no cross-contamination between the lion and tiger groups, where patients from each group attend the gym at the same time. This is critical for patient-blinding and the integrity of the study design).
- iii. Twice-weekly unsupervised exercise at home or in gym, patients' preference.

#### Phase 2 month 4-6

This phase consists of

- i. Monthly one-on-one consultations with the treating physiotherapist
- ii. Three times weekly unsupervised gym visits.

Details of one-on-one physiotherapy consultations (6 in phase 1, 3 in phase 2), physiotherapy supervised gym visits (12 in phase 1) and unsupervised gym visits (3 times week in phase 2) are detailed below.

#### One-on-one physiotherapy visits

These visits should last 30 minutes each. During these visits, the following should be completed

1. Flexion range of motion measured and recorded using inclinometer
2. Abduction and Adduction strength measured and recorded using hand-held dynamometer
3. Manual therapy as appropriate targeted to impairments in range of motion, and pain management. Details of therapy selection and progression outlined in Table 1 below.
4. Provision of standardised stretching program. See Table 2 for each weekly set of exercises
5. Provision of standardised cardiovascular fitness program. This should be handed out in first treatment and patient asked to progress self through program. See Table 3 for details below.
6. Standardised education Table 4.

**Note:** prior to the initial physiotherapy visit, the project investigator (Joanne Kemp) will contact the treating physiotherapist and provide them with details to access the exercise app, and ensure patient appointments are booked into the system.

**Please note, if patients complain of increasing pain during treatment that is concerning them or you, please contact Joanne Kemp to discuss. Do not allow the patient to continue to deteriorate without discussion.**

### **Physiotherapy-supervised gym visits**

These visits should last 30-60 minutes, depending on clinic and patient preference. These can be one-on-one or small group, as long as no cross-contamination occurs where patients from each of the two treatment groups attend at the same time. During these visits, the following should be completed

1. Completion of all current stretching exercises
2. Checking patient recording of exercises from that session (and unsupervised sessions) in exercise diary or exercise app

### **Unsupervised gym program**

Each patient will be given a gym membership for phase 2 of the program, and will be asked to

1. Attend the gym 3 times per week
2. Record each session in exercise diary or exercise app
3. Report any issues with program to the treating physiotherapist during one of the monthly one-on-one visits. Patients will also be able to contact the project investigator (Joanne Kemp) during this time with any questions about the program.

**Table 1: Manual therapy overview**

| Target for treatment             | Assessment method                        | Technique                                                                                                                                                    | Aim                                                                                                       | Description                                                                                                                                                                                       | Dosage                                                                                                     |
|----------------------------------|------------------------------------------|--------------------------------------------------------------------------------------------------------------------------------------------------------------|-----------------------------------------------------------------------------------------------------------|---------------------------------------------------------------------------------------------------------------------------------------------------------------------------------------------------|------------------------------------------------------------------------------------------------------------|
| Overactive secondary stabilisers | Palpation, pain, reduced ROM             | Soft tissue massage and trigger point release of iliopsoas, adductor group, gluteus minimus, gluteus medius, piriformis, tensor fascia latae, erector spinae | Address soft tissue restrictions with the aim of reducing pain and increasing hip joint range of movement | Sustained digital pressure to each trigger point with the muscle positioned on stretch<br><br>Massage longitudinally along the muscle belly                                                       | 30-60 seconds digital pressure per trigger point<br><br>2-5 minutes of massage per muscle                  |
| Lumbar dysfunction               | Pain, palpation, ROM                     | Mobilisation of lumbar spine                                                                                                                                 | To improve lumbar spine mobility and restore normal lumbo-pelvic movement                                 | Unilateral postero-anterior accessory glides, Grade III or IV                                                                                                                                     | 3-5 sets of 30-60 seconds                                                                                  |
| Capsular tightness               | Palpation of femoral head glide in squat | Manual traction if ligamentum teres is intact or ligated and patient is >3 months post labral repair                                                         | Increase hip flexion and/or IR/ER range of motion                                                         | Seatbelt around patient's proximal femur and therapist's hips. Gentle inferior and/or lateral traction force applied. May include patient actively moving hip into flexion as traction is applied | 3 sets of 10 seconds. If tolerated increase by 1 set per treatment session to a maximum of 6 sets in total |
| Bony limitations                 | Hard end feel in ROM tests               | None                                                                                                                                                         | Treat with respect                                                                                        | None                                                                                                                                                                                              | N/A                                                                                                        |
| Hip muscle weakness              | Hand held dynamometry                    | See section 2                                                                                                                                                | See section 2                                                                                             | See section 2                                                                                                                                                                                     | See section 2                                                                                              |

**Table 2: Weekly stretching program**

| Week 1 |                                      |                                               |                            |                                               |                                   |                                    |
|--------|--------------------------------------|-----------------------------------------------|----------------------------|-----------------------------------------------|-----------------------------------|------------------------------------|
| Hip    |                                      |                                               | Lower leg                  |                                               | Trunk                             |                                    |
|        | Description                          | Dosage                                        | Description                | Dosage                                        | Description                       | Dosage                             |
|        | a)<br>Hip Flexor stretch off plinth. | Symptomatic leg<br>30 sec hold,<br>repeat x3. | a)<br>Gastroc wall stretch | Symptomatic leg<br>30 sec hold,<br>repeat x3. | a)<br>Thoracic rotation in supine | 5 x 5sec<br>holds to<br>each side  |
|        | b)<br>Short adductor stretch         | 30 sec hold,<br>repeat x3,                    |                            |                                               | b)<br>Trunk rotation in Supine    | 5 x 5sec<br>holds to<br>each side. |
|        | c)<br>Hamstring stretch              | Symptomatic leg<br>30 sec hold,<br>repeat x3. |                            |                                               |                                   |                                    |
|        | d)<br>ITB stretch                    | Symptomatic leg<br>30 sec hold,<br>repeat x3. |                            |                                               |                                   |                                    |

| Week 2 |                                           |                                                            |                            |                                               |                                           |                                                            |
|--------|-------------------------------------------|------------------------------------------------------------|----------------------------|-----------------------------------------------|-------------------------------------------|------------------------------------------------------------|
| Hip    |                                           |                                                            | Lower leg                  |                                               | Trunk                                     |                                                            |
|        | Description                               | Dosage                                                     | Description                | Dosage                                        | Description                               | Dosage                                                     |
|        | a)<br>Trunk rotation in Supine            | 5 x 5sec holds to each side.                               | a)<br>Gastroc wall stretch | Symptomatic leg<br>40 sec hold,<br>repeat x3. | a)<br>Trunk rotation in Supine            | 5 x 5sec holds to each side.                               |
|        | b)<br>Single leg trunk rotation in supine | Alternate sides<br>30 sec hold,<br>repeat x3 to each side. | b)<br>Soleus stretch       | Symptomatic leg<br>30 sec hold,<br>repeat x3. | b)<br>Single leg trunk rotation in supine | Alternate sides<br>30 sec hold,<br>repeat x3 to each side. |
|        | c)<br>Hamstring stretch                   | Symptomatic leg<br>40 sec hold,<br>repeat x3.              |                            |                                               |                                           |                                                            |
|        | d)<br>ITB stretch                         | Symptomatic leg<br>30 sec hold,<br>repeat x3.              |                            |                                               |                                           |                                                            |

| Week 3 |                                   |                                               |           |                            |                                               |                                                                                                             |
|--------|-----------------------------------|-----------------------------------------------|-----------|----------------------------|-----------------------------------------------|-------------------------------------------------------------------------------------------------------------|
| Hip    |                                   |                                               | Lower leg |                            | Trunk                                         |                                                                                                             |
|        | Description                       | Dosage                                        |           | Description                | Dosage                                        |                                                                                                             |
|        | a)<br>Hip flexor stretch in kneel | Symptomatic leg<br>30 sec hold,<br>repeat x3. |           | a)<br>Gastroc wall stretch | Symptomatic leg<br>40 sec hold,<br>repeat x3. | a)<br>Trunk rotation in standing<br><br>5 x 5sec holds to each side.                                        |
|        | b)<br>Short adductor stretch      | 60 sec hold,<br>repeat x2.                    |           | b)<br>Soleus stretch       | Symptomatic leg<br>30 sec hold,<br>repeat x3. | b)<br>Single leg trunk rotation in supine<br><br>Alternate sides<br>40 sec hold,<br>repeat x3 to each side. |
|        | c)<br>Hamstring stretch           | Symptomatic leg<br>60 sec hold,<br>repeat x2. |           |                            |                                               |                                                                                                             |
|        | d)<br>ITB stretch                 | Symptomatic leg<br>60 sec hold,<br>repeat x2. |           |                            |                                               |                                                                                                             |

| Week 4 |                                                            |                                               |           |                            |                                               |                                                                                                                |
|--------|------------------------------------------------------------|-----------------------------------------------|-----------|----------------------------|-----------------------------------------------|----------------------------------------------------------------------------------------------------------------|
| Hip    |                                                            |                                               | Lower leg |                            | Trunk                                         |                                                                                                                |
|        | Description                                                | Dosage                                        |           | Description                | Dosage                                        |                                                                                                                |
|        | a)<br>Hip flexor stretch in kneel                          | Symptomatic leg<br>40 sec hold,<br>repeat x3. |           | a)<br>Gastroc wall stretch | Symptomatic leg<br>60 sec hold,<br>repeat x2. | a)<br>Trunk rotation in standing<br><br>5 x 5sec holds<br>to each side.                                        |
|        | b)<br>Hold/relax short adductor stretch                    | At movement barrier, 20% contraction x 3.     |           | c)<br>Tib Ant stretch      | Symptomatic leg<br>30 sec hold,<br>repeat x3. | b)<br>Single leg trunk rotation in supine<br><br>Alternate sides<br>40 sec hold,<br>repeat x3 to<br>each side. |
|        | c)<br>Hold/relax Hamstring stretch<br>(Therapist assisted) | At movement barrier, 20% contraction x 3.     |           |                            |                                               |                                                                                                                |
|        | d)<br>Gluteal stretch                                      | Symptomatic leg<br>30 sec hold,<br>repeat x3. |           |                            |                                               |                                                                                                                |

| Week 5   |                                       |                                                  |           |                                      |                                               |          |                                                        |                                   |
|----------|---------------------------------------|--------------------------------------------------|-----------|--------------------------------------|-----------------------------------------------|----------|--------------------------------------------------------|-----------------------------------|
| Hip      |                                       |                                                  | Lower leg |                                      |                                               | Trunk    |                                                        |                                   |
| Exercise | Description                           | Dosage                                           | Exercise  | Description                          | Dosage                                        | Exercise | Description                                            | Dosage                            |
|          | a)<br>Hip flexor stretch<br>in kneel  | Symptomatic<br>leg<br>60 sec hold,<br>repeat x2. |           | a)<br>Calf roller<br>stretch         | Symptomatic leg<br>40 sec x 2.                |          | a)<br>Trunk rotation<br>in standing                    | 5 x 5sec<br>holds to<br>each side |
|          | b)<br>Adductor stretch<br>in standing | Symptomatic<br>leg<br>30 sec hold,<br>repeat x3. |           | c)<br>Tib Ant stretch<br>in kneeling | Symptomatic leg<br>30 sec hold,<br>repeat x3. |          | b)<br>Lat dorsi and<br>trunk stretch<br>in prone kneel | 40 sec<br>hold x 2                |
|          | c)<br>Hamstring stretch               | Symptomatic<br>leg<br>60 sec hold,<br>repeat x2. |           |                                      |                                               |          |                                                        |                                   |
|          | d)<br>Gluteal stretch                 | Symptomatic<br>leg<br>40 sec hold,<br>repeat x3. |           |                                      |                                               |          |                                                        |                                   |



| Week 6 |                                        |                                               |           |                                  |                                               |                                                     |                                 |
|--------|----------------------------------------|-----------------------------------------------|-----------|----------------------------------|-----------------------------------------------|-----------------------------------------------------|---------------------------------|
| Hip    |                                        |                                               | Lower leg |                                  | Trunk                                         |                                                     |                                 |
|        | Description                            | Dosage                                        |           | Description                      | Dosage                                        | Description                                         | Dosage                          |
|        | a)<br>Quad stretch in side lying       | Symptomatic leg<br>30 sec hold,<br>repeat x3. |           | a)<br>Calf roller stretch        | Symptomatic leg<br>60-120 sec.                | a)<br>Trunk rotation in standing                    | 5 x 5sec holds<br>to each side. |
|        | b)<br>Adductor stretch in standing     | Symptomatic leg<br>40 sec hold,<br>repeat x3. |           | b)<br>Gastroc stretch 4 pt kneel | Symptomatic leg<br>30 sec hold,<br>repeat x3. | b)<br>Lat dorsi and trunk stretch in<br>prone kneel | 60 sec hold x 2                 |
|        | c)<br>Hamstring foam roller in sitting | Bilateral,<br>40 sec x 2.                     |           |                                  |                                               | c)<br>Elbow prop lumbar extension in<br>prone       |                                 |
|        | d)<br>Gluteal stretch on wall          | Symptomatic leg<br>30 sec hold,<br>repeat x3. |           |                                  |                                               |                                                     |                                 |

| Week 7 |                                    |                                               |           |                                  |                                               |                                                                       |
|--------|------------------------------------|-----------------------------------------------|-----------|----------------------------------|-----------------------------------------------|-----------------------------------------------------------------------|
| Hip    |                                    |                                               | Lower leg |                                  | Trunk                                         |                                                                       |
|        | Description                        | Dosage                                        |           | Description                      | Dosage                                        |                                                                       |
|        | a)<br>Quad stretch in side lying   | Symptomatic leg<br>40 sec hold,<br>repeat x3. |           | a)<br>Calf roller stretch        | Symptomatic leg<br>60-120 sec.                | a)<br>Trunk rotation in 4 point kneel<br>3 x 5sec holds to each side. |
|        | b)<br>Adductor stretch in standing | Symptomatic leg<br>60 sec hold,<br>repeat x2. |           | b)<br>Gastroc stretch 4 pt kneel | Symptomatic leg<br>30 sec hold,<br>repeat x3. | b)<br>General trunk stretch in standing<br>3 x 5sec holds.            |
|        | c)<br>Gluteal stretch on wall      | Symptomatic leg<br>40 sec hold,<br>repeat x3. |           |                                  |                                               | c)<br>Elbow prop lumbar extension in prone<br>5 x 5sec holds.         |
|        | d)<br>Gluteal foam roller          | Symptomatic leg<br>40 sec x 2.                |           |                                  |                                               |                                                                       |

| Week 8 |                                            |                                               |           |                                  |                                               |                                                                                                |
|--------|--------------------------------------------|-----------------------------------------------|-----------|----------------------------------|-----------------------------------------------|------------------------------------------------------------------------------------------------|
| Hip    |                                            |                                               | Lower leg |                                  | Trunk                                         |                                                                                                |
|        | Description                                | Dosage                                        |           | Description                      | Dosage                                        |                                                                                                |
|        | a)<br>Quad stretch in prone                | Symptomatic leg<br>60 sec hold,<br>repeat x2. |           | a)<br>LL calf stretch            | Symptomatic leg<br>30 sec hold,<br>repeat x3. | a)<br>Trunk rotation + hip flexion in standing<br><br>5 second holds, repeat x 3 to each side. |
|        | b)<br>Hamstring- stretch standing          | Symptomatic leg<br>30 sec hold,<br>repeat x3. |           | b)<br>Gastroc stretch 4 pt kneel | Symptomatic leg<br>30 sec hold,<br>repeat x3. | b)<br>Thoracic extension and pec stretch with towel<br><br>3 x 30 sec holds                    |
|        | c)<br>ITB stretch with roller              | Symptomatic leg<br>60-240 sec ,               |           |                                  |                                               | c)<br>Salute to the sun<br><br>3 x 5sec holds at end of range extension and flexion            |
|        | d)<br>ITB standing with side trunk flexion | Symptomatic leg<br>30 sec x 3.                |           |                                  |                                               |                                                                                                |

| Week 9 |                                                  |                                               |           |                                  |                                               |                                                                           |
|--------|--------------------------------------------------|-----------------------------------------------|-----------|----------------------------------|-----------------------------------------------|---------------------------------------------------------------------------|
| Hip    |                                                  |                                               | Lower leg |                                  | Trunk                                         |                                                                           |
|        | Description                                      | Dosage                                        |           | Description                      | Dosage                                        |                                                                           |
|        | a)<br>Quad stretch in prone                      | Symptomatic leg<br>60 sec hold,<br>repeat x2. |           | a) calf stretch in standing      | Symptomatic leg<br>30 sec hold,<br>repeat x3. | a)<br>Trunk rotation in 4 point kneel<br><br>3 x 5sec holds to each side. |
|        | b)<br>Hamstring- hold/relax (therapist assisted) | At movement barrier, 20% contraction x 3.     |           | b)<br>Gastroc stretch 4 pt kneel | Symptomatic leg<br>30 sec hold,<br>repeat x3. | b)<br>General trunk stretch in standing<br><br>3 x 5sec holds.            |
|        | c)<br>ITB stretch with roller                    | Symptomatic leg<br>60-240 sec ,               |           |                                  |                                               | c)<br>Extension in lying<br><br>5 x 5 second holds                        |
|        | d)<br>ITB standing                               | Symptomatic leg<br>30 sec x 3.                |           |                                  |                                               |                                                                           |

| Week 10 |                                  |                                               |           |                                |                                               |                                                     |
|---------|----------------------------------|-----------------------------------------------|-----------|--------------------------------|-----------------------------------------------|-----------------------------------------------------|
| Hip     |                                  |                                               | Lower leg |                                | Trunk                                         |                                                     |
|         | Description                      | Dosage                                        |           | Description                    | Dosage                                        |                                                     |
|         | a)<br>Quad stretch in standing   | Symptomatic leg<br>30 sec hold,<br>repeat x3. |           | a)<br>Calf roller stretch      | Symptomatic leg<br>60-120 sec.                | a)<br>Trunk rotation + hip flexion in standing      |
|         | b)<br>ITB standing               | Symptomatic leg<br>40 sec hold,<br>repeat x3. |           | b)<br>calf stretch in standing | Symptomatic leg<br>40 sec hold,<br>repeat x3. | b)<br>Thoracic extension and pec stretch with towel |
|         | c)<br>Gluteal foam roller        | Symptomatic leg<br>60-120 sec.                |           |                                |                                               | c)<br>Salute to the sun                             |
|         | d)<br>Hamstring stretch standing | Symptomatic leg<br>40 sec hold,<br>repeat x3. |           |                                |                                               |                                                     |

| <b>Week 11</b> |                                     |                                               |                  |                           |                                                  |              |                                                        |                                                  |
|----------------|-------------------------------------|-----------------------------------------------|------------------|---------------------------|--------------------------------------------------|--------------|--------------------------------------------------------|--------------------------------------------------|
| <b>Hip</b>     |                                     |                                               | <b>Lower leg</b> |                           |                                                  | <b>Trunk</b> |                                                        |                                                  |
|                | <b>Description</b>                  | <b>Dosage</b>                                 |                  | <b>Description</b>        | <b>Dosage</b>                                    |              | <b>Description</b>                                     | <b>Dosage</b>                                    |
|                | a)<br>Quad stretch in standing      | Symptomatic leg<br>30 sec hold,<br>repeat x3. |                  | a)<br>Calf roller stretch | Symptomatic<br>leg<br>60-120 sec.                |              | a)<br>Thoracic extension and pec<br>stretch with towel | 3 x 40 sec<br>holds                              |
|                | b)<br>ITB standing                  | Symptomatic leg<br>40 sec hold,<br>repeat x3. |                  | b)<br>LL calf stretch     | Symptomatic<br>leg<br>40 sec hold,<br>repeat x3. |              | b)<br>ITB + trunk lateral flexion                      | Symptomatic<br>leg<br>40 sec hold,<br>repeat x3, |
|                | c)<br>Piriformis stretch in prone   | Symptomatic leg<br>40 sec hold,<br>repeat x3. |                  |                           |                                                  |              | c)<br>Salute to the sun                                | 5 x 5sec holds<br>at end ext and<br>flexion      |
|                | d)<br>Hamstring stretch<br>standing | Symptomatic leg<br>40 sec hold,<br>repeat x3. |                  |                           |                                                  |              |                                                        |                                                  |

| Week 12 |                                            |                                                 |           |                                  |                                               |                                                        |                                                  |
|---------|--------------------------------------------|-------------------------------------------------|-----------|----------------------------------|-----------------------------------------------|--------------------------------------------------------|--------------------------------------------------|
| Hip     |                                            |                                                 | Lower leg |                                  | Trunk                                         |                                                        |                                                  |
|         | Description                                | Dosage                                          |           | Description                      | Dosage                                        | Description                                            | Dosage                                           |
|         | a)<br>Quad stretch in standing             | Symptomatic leg<br>30 sec hold,<br>repeat x3.   |           | a)<br>LL calf stretch            | Symptomatic leg<br>40 sec hold,<br>repeat x3. | a)<br>Thoracic extension and pec<br>stretch with towel | 3 x 40 sec<br>holds                              |
|         | b)<br>Hold/relax short adductor<br>stretch | At movement<br>barrier, 20%<br>contraction x 3. |           | b)<br>Gastroc stretch 4 pt kneel | Symptomatic leg<br>60 sec hold,<br>repeat x2. | b)<br>ITB + trunk lateral flexion                      | Symptomatic<br>leg<br>40 sec hold,<br>repeat x3, |
|         | c)<br>Piriformis stretch in prone          | Symptomatic leg<br>40 sec hold,<br>repeat x3.   |           |                                  |                                               | c)<br>Salute to the sun                                | 5 x 5sec holds<br>at end ext and<br>flexion      |
|         | d)<br>Hamstring stretch standing           | Symptomatic leg<br>40 sec hold,<br>repeat x3.   |           |                                  |                                               |                                                        |                                                  |

**Table 3: Cardiovascular fitness standardised program**

| Cardiovascular training |                        |                                                                                                                                                                                                                                                                          |                                                                              |
|-------------------------|------------------------|--------------------------------------------------------------------------------------------------------------------------------------------------------------------------------------------------------------------------------------------------------------------------|------------------------------------------------------------------------------|
| Phase                   | Exercise               | Description                                                                                                                                                                                                                                                              | Dosage                                                                       |
| 1                       | Level 1 patient choice | Cycling (stationary or road bike, no MTB); swimming (no breaststroke); other aquatic activity (water aerobics, water jogging no egg beater kick); walking (on flat terrain, no beach or bush walking); kayaking; rowing (if flexion ROM >100); elliptical cross trainer. | As much as hip pain will allow. Progress to Level 2 when patient feels ready |
| 2                       | Level 2 patient choice | Dance, running, MTB, athletics, bush walking, netball, football (all codes), hockey, racquet sports                                                                                                                                                                      | As much as hip pain will allow                                               |

**Table 4. Key education components**

1. Weight maintenance with recommended weight loss if BMI  $\geq$  25. Patients are encouraged to seek their own guidance for weight loss. Specific patient questions can be answered.
2. Patients' expectations of treatment and activity. Patients are encouraged to do as much activity as their hip pain allows. No specific guidance is offered around activity modification, but patient-specific questions can be answered.
