# Supplementary material for: Physiotherapist-led treatment for femoroacetabular impingement syndrome (the PhysioFIRST study): a protocol for a participant and assessor-blinded randomised controlled trial
Source: PubMed Central journal article supplement — BMJ Open. 2021 Apr 7;11(4):e041742. doi: 10.1136/bmjopen-2020-041742 (PMC8031040; doi:10.1136/bmjopen-2020-041742), 2021-04-07
Supplement: bmjopen-2020-041742supp006.pdf [file bmjopen-2020-041742supp006.pdf]

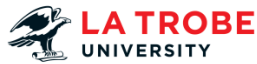

Participant Code: PF \_\_\_\_

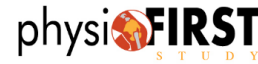

**La Trobe Sports and Exercise Medicine Research Centre**  
**Consent form for persons participating in research projects**

LTU ethics approval number HEC17-080

**The physiotherapy for Femoroacetabular Impingement Rehabilitation Study (PhysioFIRST): A participant and assessor-blinded randomised controlled trial of physiotherapy for hip impingement.**

Investigators: Dr Joanne Kemp, Sally Coburn, Denise Jones, Dr Anthony Schache, Dr Benjamin Mentiplay  
 Associate Professor Dr Steven McPhail, Professor Kay Crossley

I, \_\_\_\_\_, have read and understood the **participant information statement and consent form**, and any questions I have asked have been answered to my satisfaction. I understand that even though I agree to be involved in this project, I can withdraw from the study at any time, up to four weeks following the completion of my participation in the research. Further, in withdrawing from the study, I can request that no information from my involvement be used. I agree that research data provided by me or with my permission during the project may be included in a thesis, presented at conferences and published in journals on the condition that neither my name nor any other identifying information is used.

I consent to my data being included in other research projects. I acknowledge that my data will be coded, but can be potentially identified. Yes No

I consent to my single leg squat test being videoed. I acknowledge that any video data will be de-identified. Yes No

I understand my participation will not affect my current or future staff/student affiliation/physiotherapy management with: Yes No

I consent to be involved in the additional testing of physical activity using the Fitbit device Yes No

I consent to be involved in the additional testing of my movement patterns through biomechanical assessment Yes No

I consent to be involved in the additional testing of hip joint structure via Magnetic Resonance Imaging (MRI) scans Yes No

I wish to have a summary report sent to me at the conclusion of my participation in this project. Yes No

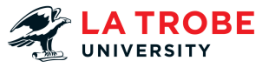

Participant Code: PF \_\_\_\_

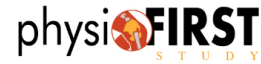

|               |             |                       |
|---------------|-------------|-----------------------|
| Last Name:    | Given Name: |                       |
| DOB:          | Age:        | Contact Phone number: |
| Address:      |             |                       |
| Signature:    | Date:       |                       |
| Witness name: | Date:       |                       |
| Investigator: | Date:       |                       |

**Name and phone number of contact person in case of an emergency:**

|                |        |
|----------------|--------|
| Name:          | Phone: |
| Family Doctor: | Phone: |
